# Supplementary material for: A Computational Methodology to Screen Activities of Enzyme Variants
Source: PLOS journal article supplement (doi:10.1371/journal.pone.0049849), 2012-12-17
Supplement: S1 (10.1371/journal.pone.0049849.s001) [file journal.pone.0049849.s001]

# S1 A Computational Methodology to Screen Activities of Enzyme Variants: Supplementary Material

Martin Hediger, Luca De Vico, Allan Svendsen, Werner Besenmatter, Jan H. Jensen. Corresponding Author, Email: jhjensen@chem.ku.dk

## Difference MOZYME/PM6 Energies

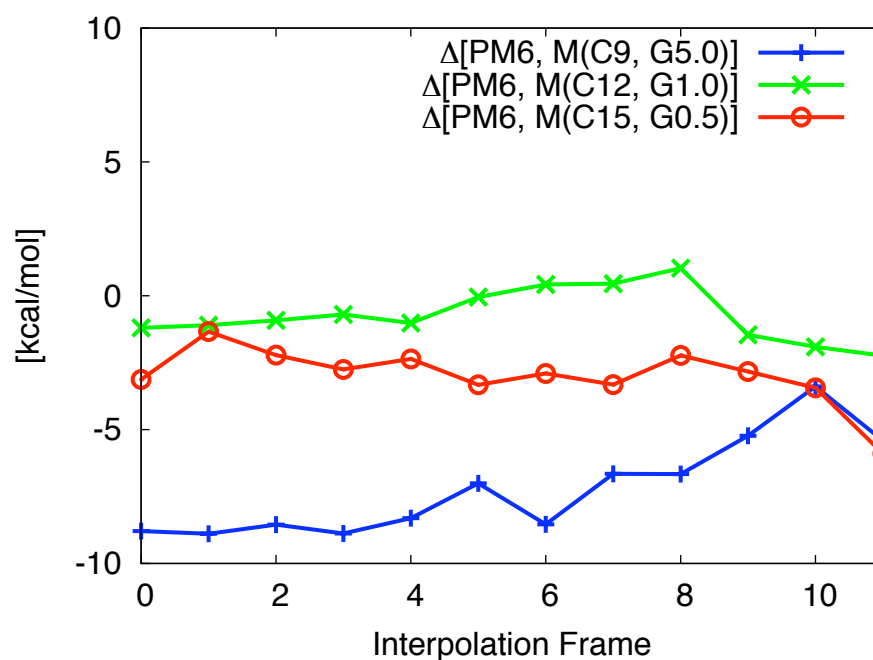

**Figure 15.** Difference  $\Delta H_f^{\text{PM6}} - \Delta H_f^{\text{MOZYME}}$  between PM6 and MOZYME (not reorthogonalized) energy at each interpolation frame in (b). Average difference (in kcal/mol): -7.19, -0.73, -2.98 for NDDO cutoff 9, 12, and 15Å, respectively.

## Amino Acids in Models (a), (b) and (c)

All amino acids in the indicated ranges included in the respective models.

(a): 38-42, 103-106, 134, 187, 189, 223-225, 278, 281

(b): 37-50, 102-106, 131-135, 139-141, 156-158, 186-192, 220-226, 277-287

(c): 35-52, 66-83, 101-114, 128-141, 153-158, 163-167, 172-174, 179-193, 200-204, 223-233, 277-285

## **Transition State Verification**

The animation of the vibration can be found online under:

<http://www.youtube.com/watch?v=7ZLaqH2xDy8>

## **Git Repository for Scripts**

The scripts used in the development of this method are available under:

[git@github.com:mzhKU/Enzyme-Screening.git](https://github.com/mzhKU/Enzyme-Screening.git)
